# Supplementary material for: Career choices of underrepresented and female postdocs in the biomedical sciences
Source: eLife. 2020 Jan 3;9:e48774. doi: 10.7554/eLife.48774 (PMC6977964; doi:10.7554/eLife.48774)
Supplement: Figure 1—figure supplement 1—source data 1. [file elife-48774-fig1-figsupp1-data1.xlsx]

## Sheet: Sheet1
			Less committed				Stayed the same				More committed				Total
			n	weight, %	% of Total	Early v. Late	n	weight, %	% of Total	Early v. Late	n	weight, %	% of Total	Early v. Late
		Year 1	86	0.233062	0.534161	0.536469	61	0.286385	0.378882	0.365837	14	0.229508	0.0869565	0.104622	161
		Year 2	83	0.224932	0.572414		47	0.220657	0.324138		15	0.245902	0.103448		145
		Year 3	50	0.135501	0.480769		41	0.192488	0.394231		13	0.213115	0.125		104
		Year 4	55	0.149051	0.611111	0.64737	27	0.126761	0.3	0.277244	8	0.131148	0.0888889	0.0894941	90
		Year 5	37	0.100271	0.616667		17	0.0798122	0.283333		6	0.0983607	0.1		60
		Year 6	29	0.0785908	0.74359		9	0.0422535	0.230769		1	0.0163934	0.025641		39
		Year 7+	29	0.0785908	0.659091		11	0.0516432	0.25		4	0.0655738	0.0909091		44
		Total	369		0.573872		213		0.33126		61		0.0948678		643
			Less committed				Stayed the same				More committed
		URM	56	0.589474			24	0.252632			15	0.157895
		Total	95				95				95
		WR	315	0.56553			195	0.35009			47	0.0843806
		Total	557				557				557
		Female	241	0.583535			130	0.31477			42	0.101695
		Total	413				413				413
		Male	130	0.543933			89	0.372385			20	0.083682
		Total	239				239				239
