# Supplementary material for: Career choices of underrepresented and female postdocs in the biomedical sciences
Source: eLife. 2020 Jan 3;9:e48774. doi: 10.7554/eLife.48774 (PMC6977964; doi:10.7554/eLife.48774)
Supplement: Figure 1—source data 1. [file elife-48774-fig1-data1.xlsx]

## Sheet: Sheet1
		Non-Science Related	Non-Research, Science-Related	Other Research-Intensive (e.g. Industry)	Academic (Faculty), Teaching-Intensive	Academic (Faculty), Research-Intensive	Total
	WRM	7	52	118	31	218	426
	URMM	2	11	12	7	23	55
	WRF	10	78	183	81	298	650
	URMF	2	13	33	15	54	117
	Total	21	154	346	134	593	1248
