# Supplementary material for: Career choices of underrepresented and female postdocs in the biomedical sciences
Source: eLife. 2020 Jan 3;9:e48774. doi: 10.7554/eLife.48774 (PMC6977964; doi:10.7554/eLife.48774)
Supplement: Figure 3—figure supplement 1—source data 1. [file elife-48774-fig3-figsupp1-data1.xlsx]

## Sheet: Sheet1
			Well-represented (WR)	stdv	stderror	Underrepresented Minority (URM)	stdv	stderror
		Outcome expectations	3.32563	0.693406	0.0214501	3.22992	0.681049	0.0523883
		Research self-efficacy	3.6622	0.633119	0.0195852	3.79167	0.64422	0.0495554
			URM-Male	stdv		URM-Female	stdv	stderror
		Outcome expectations	3.30423	0.530942	0.0715922	3.19503	0.740697	0.0690704
		Research self-efficacy	3.9	0.520885	0.0485727	3.74035	0.69125	0.0644594
			WR-Male	stdv		WR-Female	stdv	stderror
		Outcome expectations	3.4408	0.684315	0.0338372	3.24921	0.689379	0.0273787
		Research self-efficacy	3.78533	0.616584	0.0304881	3.58139	0.631531	0.0250813
