# Supplementary material for: Career choices of underrepresented and female postdocs in the biomedical sciences
Source: eLife. 2020 Jan 3;9:e48774. doi: 10.7554/eLife.48774 (PMC6977964; doi:10.7554/eLife.48774)
Supplement: Supplementary file 2. [file elife-48774-supp2.xlsx]

## Sheet: Sheet1
	Current Postdoctoral Institution of Respondents	Number of Respondents	Representation Percentage
	Aaron Diamond AIDS Research Center	1	<1%
	Albert Einstein College of Medicine	42	0.0328638
	Anschutz Medical School, UC Denver	1	<1%
	Baylor College of Medicine	3	<1%
	Benaroya Research Institute	1	<1%
	Boston University or Boston University School of Medicine	33	0.0258216
	Buck Institute for Research on Aging	1	<1%
	CDC	1	<1%
	Cedars-Sinai Medical Center	13	0.0101721
	Center for Infectious Disease Research	1	<1%
	Children's Hospital Los Angeles	1	<1%
	City University of New York	14	0.0109546
	Cleveland Clinic or Lerner Research Institute	23	0.0179969
	Columbia University or Columbia University Medical Center	62	0.0485133
	CU BOulder	1	<1%
	Dana-Farber Cancer Institute	1	<1%
	Duke University or Duke University School of Medicine	3	<1%
	Emory University or Emory University School of Medicine	6	<1%
	Fred Hutchinson Cancer Research Center	23	0.0179969
	Harvard University or Harvard Medical School	2	<1%
	loyola university	1	<1%
	Ludwig Institute for Cancer Research	1	<1%
	Massachusetts General Hospital	1	<1%
	Massachusetts Institute of Technology	4	<1%
	Medical College of Wisconsin	23	0.0179969
	Memorial Sloan Kettering Cancer Center	55	0.043036
	Mount Sinai Icahn School of Medicine	84	0.0657277
	National Institutes of Health	26	0.0203443
	New York University or NYU School of Medicine	38	0.029734
	Northwestern University	11	0.0086072
	Oakland University	1	<1%
	Ohio State University	20	0.0156495
	Oregon Health and Science University	3	<1%
	Penn State University or Penn State College of Medicine	12	0.00938967
	Princeton University	1	<1%
	Rosalind Franklin University of Medicine & Science	2	<1%
	Salk Institute	2	<1%
	Sanford Burnham Prebys Medical Discovery Institute	2	<1%
	Scripps Research Institute	1	<1%
	Smithsonian Institution	1	<1%
	Stanford University or Stanford University School of Medicine	129	0.100939
	Texas Tech University	2	<1%
	The Rockefeller University	30	0.0234742
	Thomas Jefferson University	3	<1%
	Tufts University	1	<1%
	UC Davis	1	<1%
	Univeristy of Maryland, Baltimore or University of Maryland School of Medicine	26	0.0203443
	univeristy of Southern California	1	<1%
	University of Arizona	1	<1%
	University of California Irvine	3	<1%
	University of California San Francisco	68	0.0532081
	University of California, Berkeley	1	<1%
	University of California, Los Angeles	2	<1%
	University of California, San Diego or Scripss Institute	57	0.0446009
	University of Chicago	2	v
	University of Cincinnati or Cincinnati Children's Hospital Medical Center	46	0.0359937
	University of Colorado	37	0.0289515
	University of Connecticut	1	<1%
	University of Illinois at Chicago	54	0.0422535
	University of Iowa	3	<1%
	University of Massachusetts Amherst	1	<1%
	University of Massachusetts Boston	1	<1%
	University of Nevada Reno	1	<1%
	University of North Carolina at Chapel Hill	35	0.0273865
	University of Oklahoma	1	<1%
	University of Rochester Medical Center	7	0.00547731
	University of Southern California	2	<1%
	University of Tennessee Health Science Center	10	0.00782473
	University of Texas Health Science Center at San Antonio	1	<1%
	University of Texas Medical Branch - Galveston	7	0.00547731
	University of Texas Southwestern Medical Center	32	0.0250391
	University of Utah or Huntsman Cancer Institute	39	0.0305164
	University of Wisconsin-Madison	15	0.0117371
	Unknown	34	0.0266041
	UT Health Science Center	7	0.00547731
	Van Andel Research Institute	3	<1%
	Vanderbilt University	1	<1%
	Virginia Commonwealth University	2	<1%
	Washington University St. Louis	14	0.0109546
	Wayne State University	1	<1%
	Weill Cornell Medicine	74	0.057903
		1278

## Sheet: Sheet2
		Top U.S. life science research institutions
	1	Harvard University
	2	NIH
	3	Stanford University
	4	Massachusetts Institute of Technology (MIT)
	5	Yale University
	6	University of California, San Diego (UC San Diego)
	7	University of California San Francisco (UCSF)
	8	University of Pennsylvania (Penn)
	9	Columbia University in the City of New York (CU)
	10	Johns Hopkins University (JHU)
	11	Washington University in St. Louis (WUSTL)
	12	University of Michigan (U-M)
	13	The University of Texas Southwestern Medical Center (UT Southwestern Medical Center)
	14	Cornell University
	15	University of California Berkeley (UC Berkeley)
	16	New York University (NYU)
	17	University of California Los Angeles (UCLA)
	18	University of Washington (UW)
	19	Northwestern University (NU)
	20	Duke University
	21	University of North Carolina at Chapel Hill (UNC)
	22	The University of Chicago (UChicago)
	23	University of Wisconsin-Madison (UW-Madison)
	24	The Rockefeller University
	25	Memorial Sloan Kettering Cancer Center
	26	Baylor College of Medicine (BCM)
	27	Vanderbilt University (VU)
	28	Princeton University
	29	California Institute of Technology (Caltech)
	30	The University of Texas MD Anderson Cancer Center
	31	University of Pittsburgh (Pitt)
	32	University of California Davis (UC Davis)
	33	Emory University
	34	Icahn School of Medicine at Mount Sinai (ISMMS), MSHS
	35	University of Minnesota (UMN)
	36	Rutgers, The State University of New Jersey (RU)
	37	University of Illinois at Urbana-Champaign (UIUC)
	38	The University of Texas at Austin (UT Austin)
	39	University of Southern California (USC)
	40	University of Utah (Utah)
	41	The Pennsylvania State University (Penn State)
	42	University of Massachusetts Medical School (UMass Medical School)
	43	The Ohio State University (OSU)
	44	Albert Einstein College of Medicine (Einstein)
	45	University of Colorado Denver | Anschutz Medical Campus (CU Anschutz)
	46	University of California Irvine (UCI)
	47	Indiana University (IU)
	48	Boston University (BU)
	49	University of Cincinnati (UC)
	50	Oregon Health and Science University (OHSU)
	51	Texas A&M University (TAMU)
	52	Case Western Reserve University (CWRU)
	53	University of Virginia (UVA)
	54	The University of Iowa (UI)
	55	University of Florida (UF)
	56	Michigan State University (MSU)
	57	University of Colorado Boulder (CU-Boulder)
	58	University of Rochester (UR)
	59	The University of Georgia (UGA)
	60	Dartmouth College
	61	The University of Texas Health Science Center at Houston (UTHealth)
	62	University of Maryland, Baltimore (UMB)
	63	University of Maryland, College Park (UMCP)
	64	University of California Santa Cruz (UCSC)
	65	University of California Riverside (UCR)
	66	Purdue University
	67	University of California Santa Barbara (UCSB)
	68	University of Miami (UM)
	69	University of Alabama at Birmingham (UAB)
	70	University of Connecticut (UConn)
	71	Brandeis University
	72	University of Kentucky (UK)
	73	The University of Arizona (Arizona)
	74	Brown University
	75	State University of New York at Stony Brook (SUNY Stony Brook)
	76	University of Illinois at Chicago (UIC)
	77	Carnegie Mellon University (CMU)
	78	Medical University of South Carolina (MUSC)
	79	University of Missouri-Columbia (Mizzou)
	80	Tufts University
	81	Temple University
	82	Thomas Jefferson University (TJU)
	83	Arizona State University (ASU)
	84	University of Massachusetts Amherst (UMass Amherst)
	85	Rice University
	86	The University of Kansas (KU)
	87	Colorado State University
	88	Georgia Institute of Technology (Georgia Tech)
	89	University of Oregon (UO)
	90	University at Buffalo, The State University of New York (SUNY UB)
	91	Oregon State University (OSU)
	92	Wayne State University (WSU)
	93	Louisiana State University (LSU)
	94	The City University of New York (CUNY)
	95	The University of Texas Health Science Center at San Antonio (UT Health Science Center at San Antonio)
	96	Augusta University
	97	University of Vermont (UVM)
	98	University of Texas Medical Branch (UTMB)
	99	Iowa State University
	100	University of Nebraska Medical Center (UNMC)
	101	Georgia State University (GSU)
	102	University of Nebraska-Lincoln (UNL)
